# Supplementary material for: MicroRNA Profiles in Intestinal Epithelial Cells in a Mouse Model of Sepsis
Source: MDPI journal article supplement (doi:10.3390/cells12050726), 2023-02-24
Supplement: s1 [file s1]

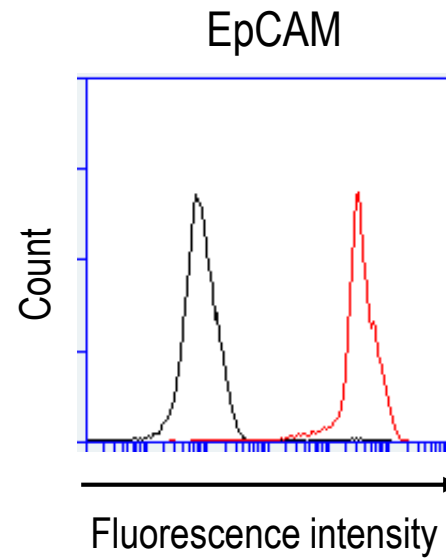

**Figure S1.** Confirmation of EpCAM expression in the IECs isolated and further enriched with EpCAM microbeads using flow cytometry. The representative histogram is shown. Black line, isotype control; and red line, anti-EpCAM monoclonal antibody.

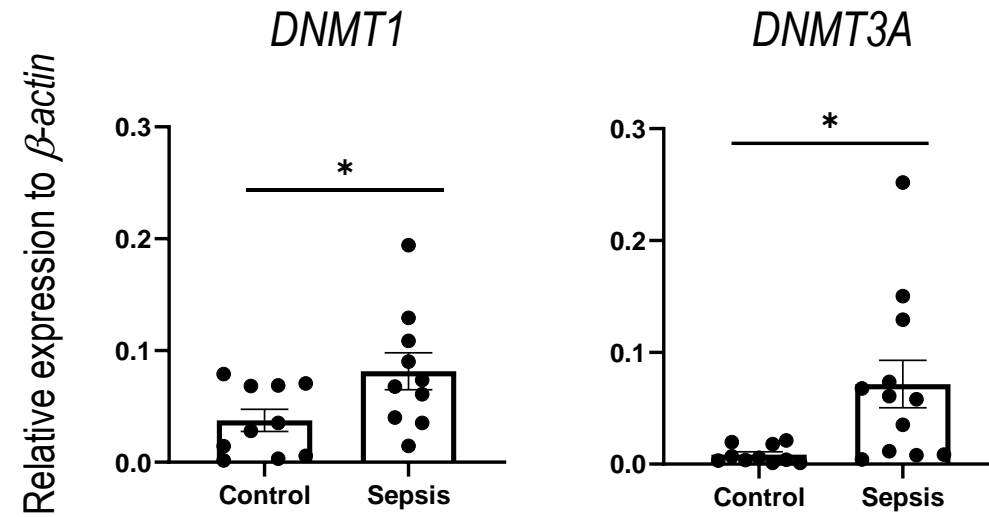

**Figure S2.** Validation of *DNMT1* and *DNMT3A* expressions. *DNMT1* and *DNMT3A* upregulated in sepsis IECs were confirmed by using real-time quantitative PCR (RT-qPCR) analysis. *b-actin* was used as an endogenous control to normalize mRNA expression levels. Data are shown as scatter plots and bars overlaid with the mean  $\pm$  standard error of the mean (SEM). Dot on the plot represents the value of each mouse. Control and sepsis indicate the IECs isolated from sham and sepsis cohorts, respectively. \* $P < 0.05$ .

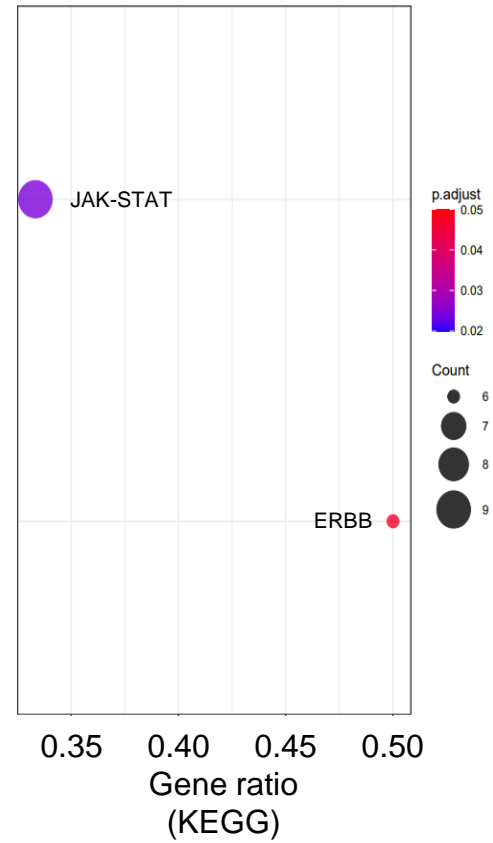

**Figure S3.** Bioinformatic analysis of downstream signaling and regulatory pathways by downregulated miRNAs with sepsis. KEGG pathway analysis is shown in three-way bubble plot analysis in the basis of gene ratio, gene count, and adjusted p-value.

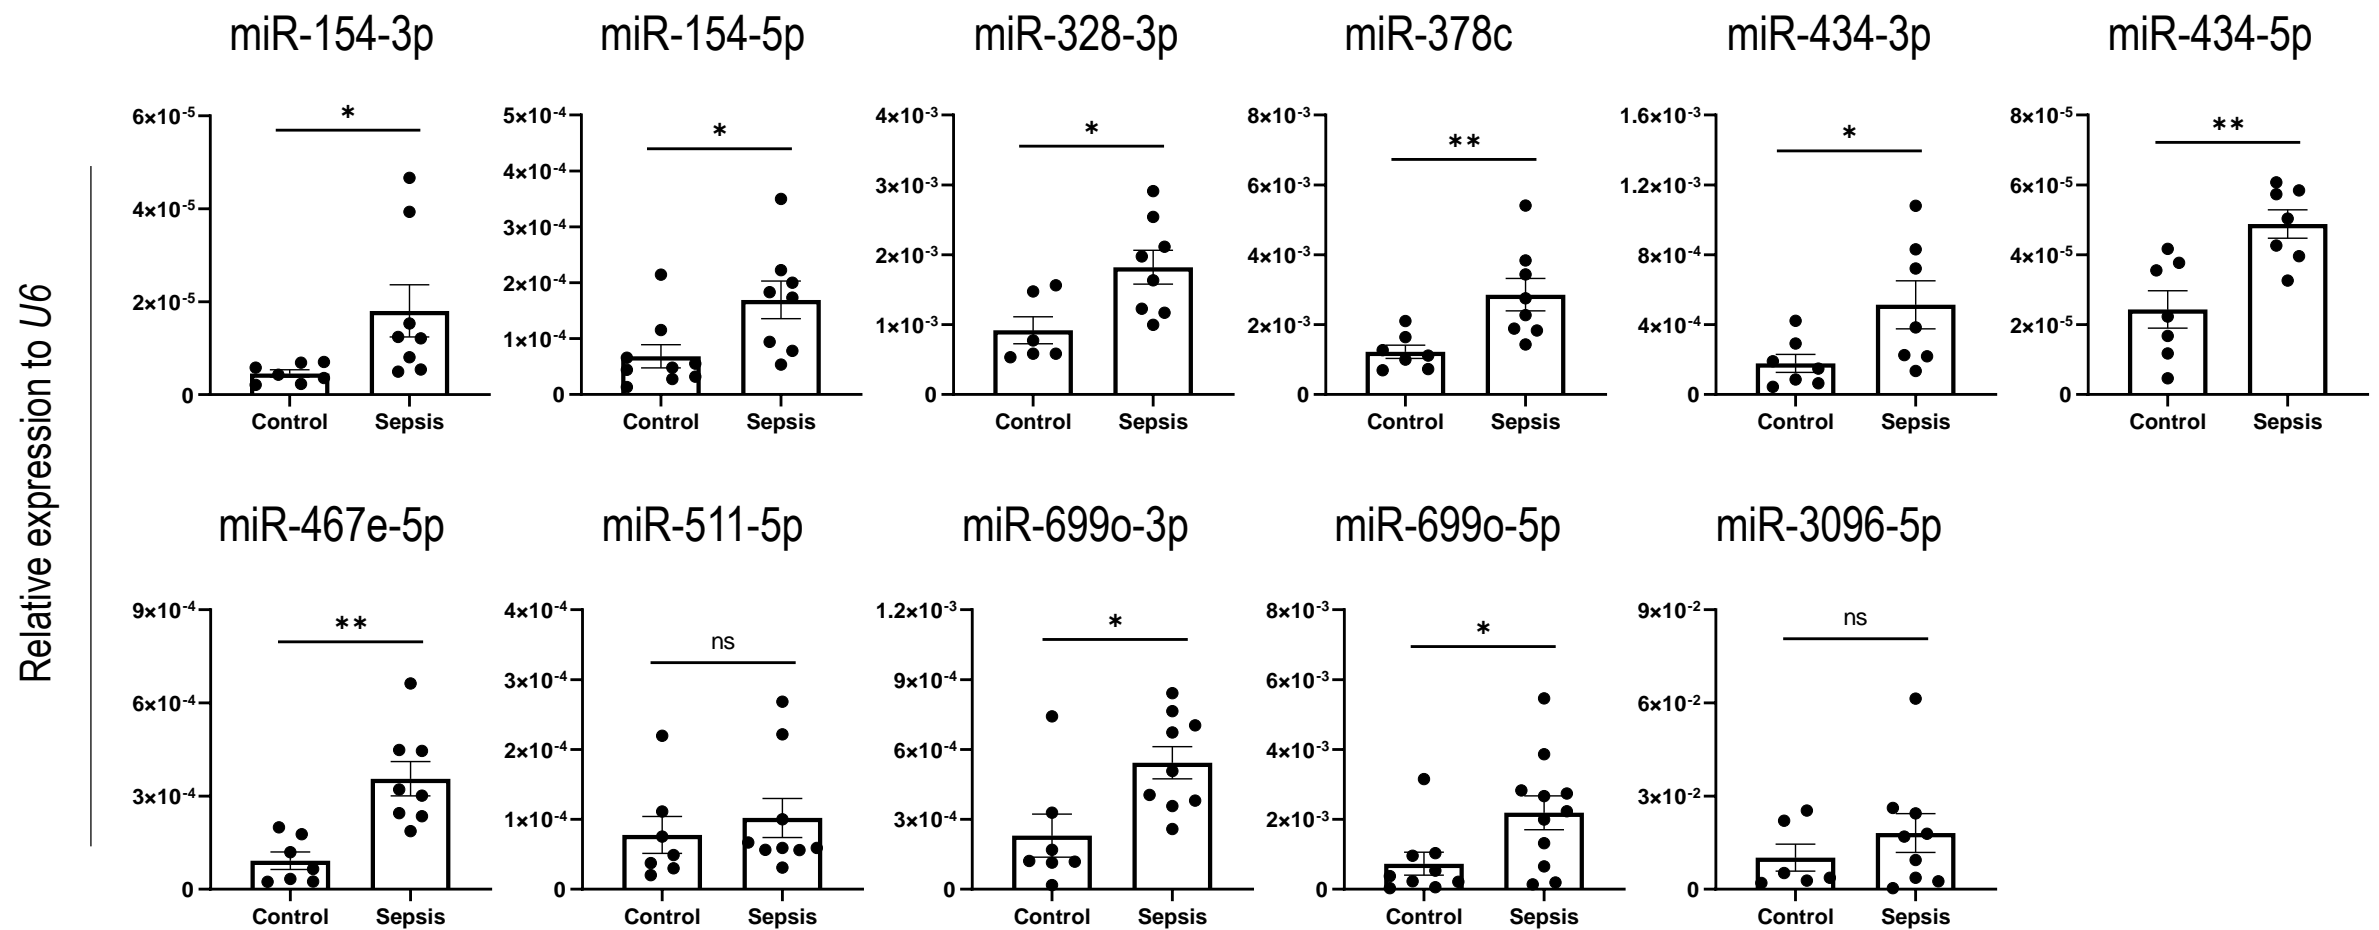

**Figure S4.** Validation of expression of other sepsis-increased miRNAs. A majority of other miRNAs upregulated in sepsis IECs were confirmed by using RT-qPCR analysis. *U6* was used as an endogenous control to normalize miRNA expression levels. Data are shown as scatter plots and bars overlaid with the mean  $\pm$  standard error of the mean (SEM). Dot on the plot represents the value of each mouse. Control and sepsis indicate the IECs isolated from sham and sepsis cohorts, respectively. \* $P < 0.05$ ; \*\* $P < 0.01$ ; and ns, not significant.

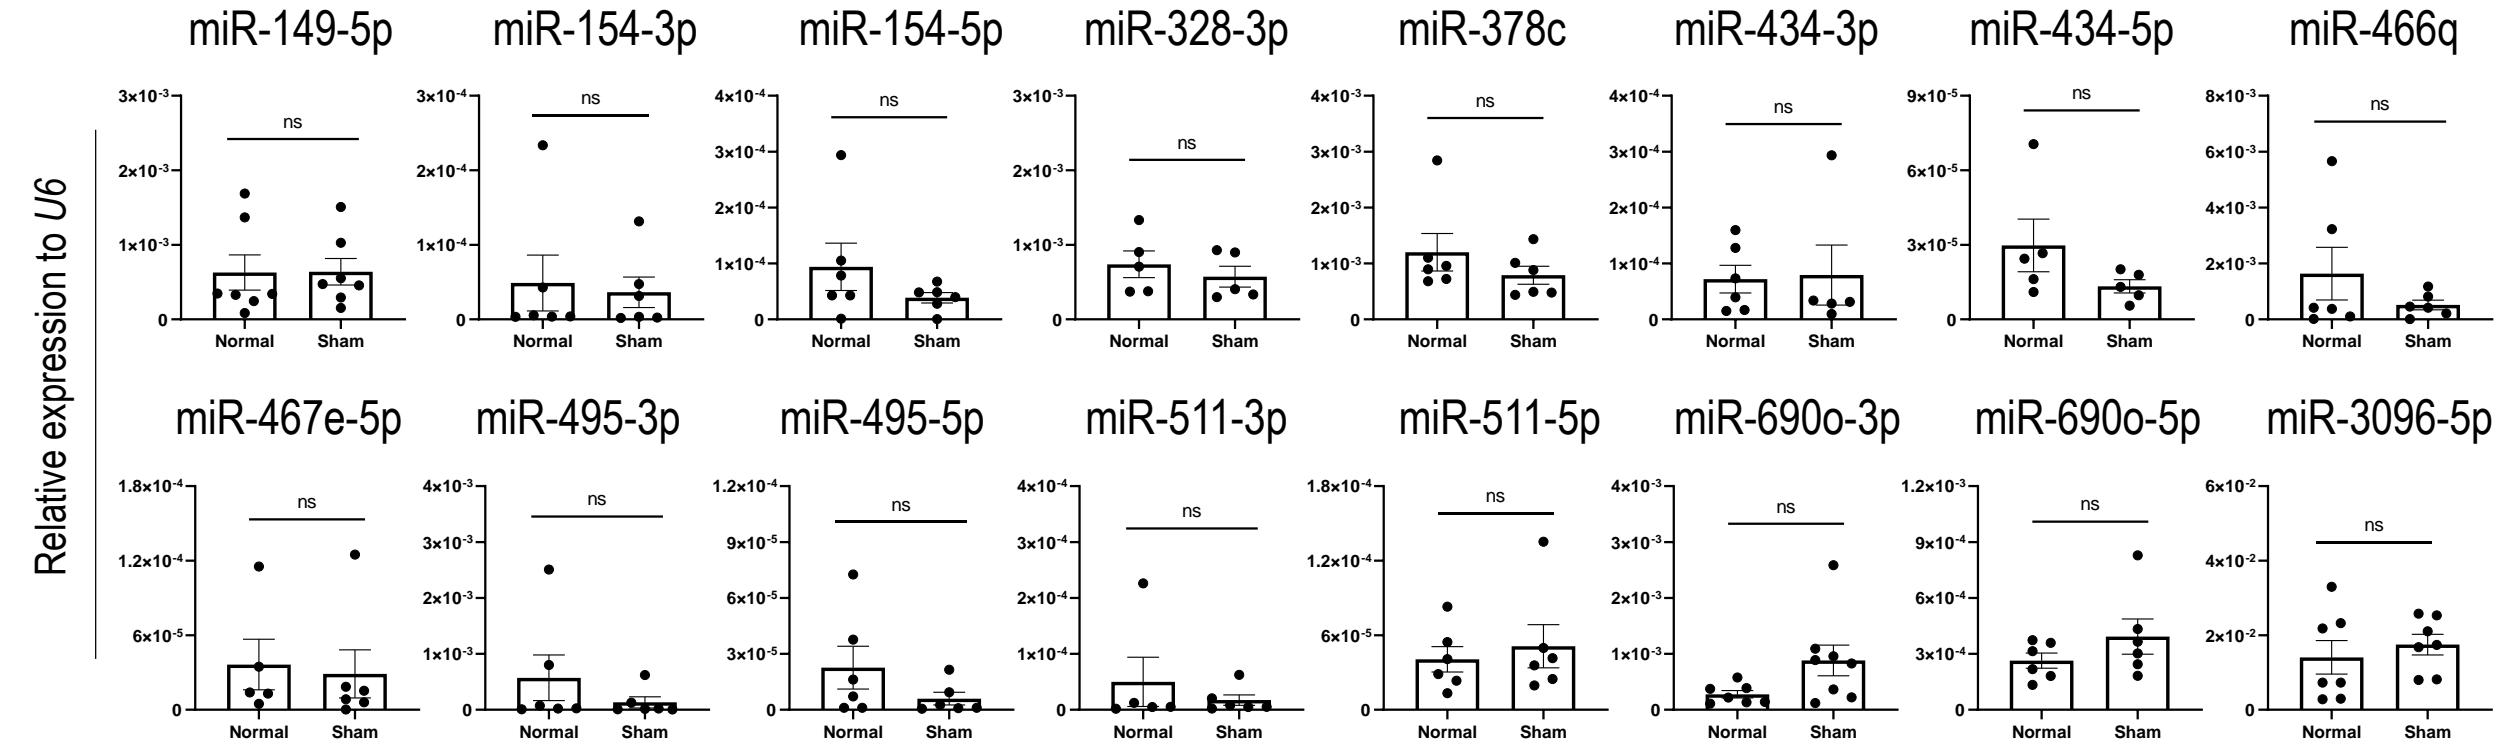

**Figure S5.** Comparable expression of sepsis-increased miRNAs in IECs of normal and antibiotics-treated sham mice. The miRNAs upregulated in the IECs of sepsis mice were tested for their expressions in the IECs of normal and sham mice by using RT-qPCR analysis. *U6* was used as an endogenous control to normalize miRNA expression levels. Data are shown as scatter plots and bars overlaid with the mean  $\pm$  standard error of the mean (SEM). Dot on the plot represents the value of each mouse. Control and sepsis indicate the IECs isolated from sham and sepsis cohorts, respectively. ns, not significant.

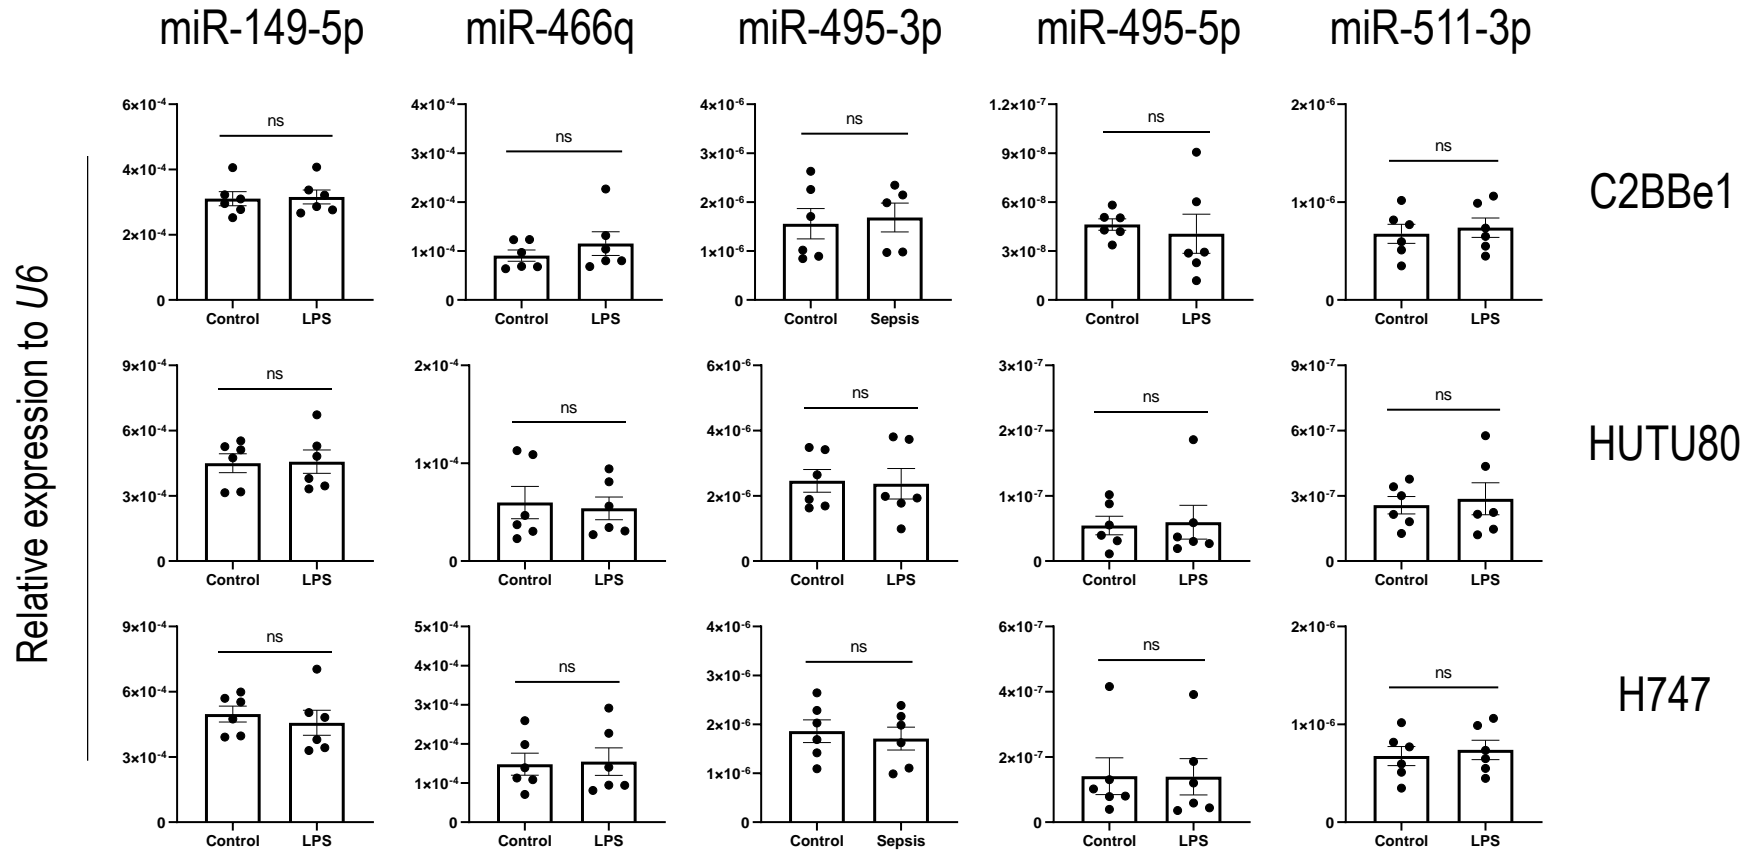

**Figure S6.** Analysis of expression of the miRNAs upregulated in IECs of sepsis mice in three human IEC lines untreated and treated with LPS. The miRNAs upregulated in the IECs of sepsis mice were tested for their expressions in three human IEC lines (C2BBE1, HUTU80, and H747) between control and LPS treatment by using RT-qPCR analysis. *U6* was used as an endogenous control to normalize miRNA expression levels. Data are shown as scatter plots and bars overlaid with the mean  $\pm$  standard error of the mean (SEM). Dot on the plot represents the value of each treatment to cells cultured on a well of 6-well plates. Control and LPS indicate the cells untreated and treated with LPS, respectively. ns, not significant.

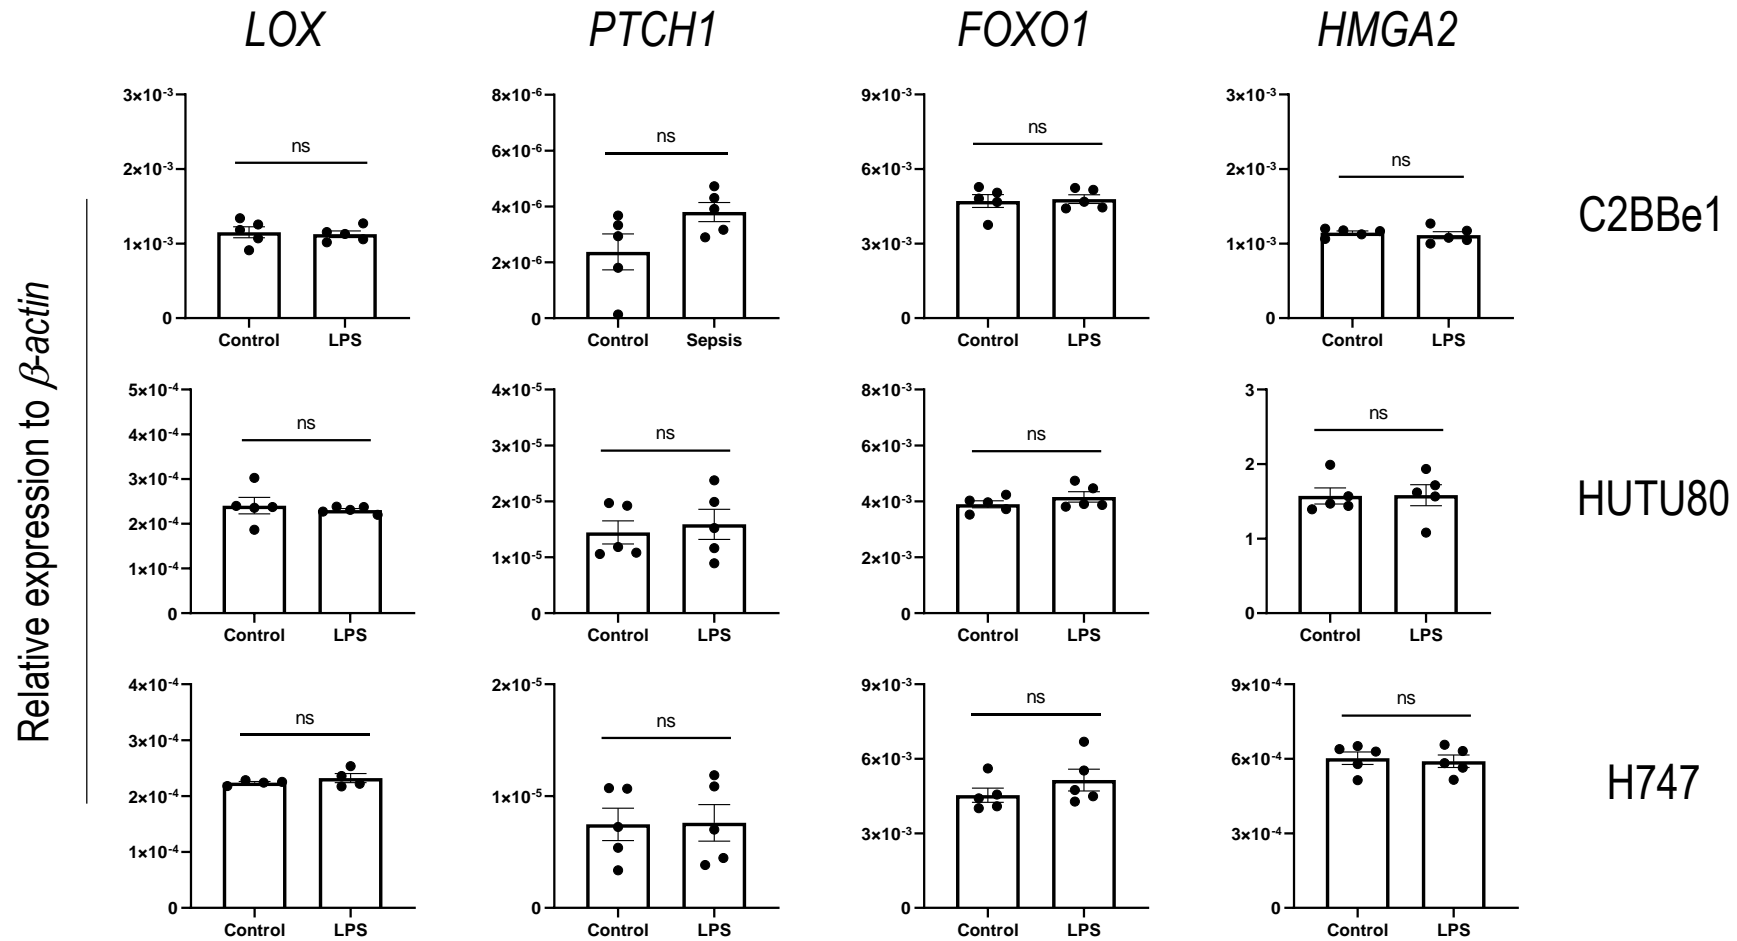

**Figure S7.** Analysis of expression of four target mRNAs in three human IEC lines untreated and treated with LPS. The expression of the mRNAs of putative targets (LOX, PTCH1, COL22A1, FOXO1, and HMGA2) was analyzed by using RT-qPCR analysis with RNA extracted from the IECs of sham and sepsis mice.  $\beta$ -actin was used as an endogenous control to normalize mRNA expression levels. Data are shown as scatter plots and bars overlaid with the mean  $\pm$  standard error of the mean (SEM). Dot on the plot represents the value of each treatment to cells cultured on a well of 6-well plates. Control and LPS indicate the cells treated with mock (PBS) and LPS, respectively. ns, not significant.

**Table S1.** List, ENSEMBL No. and RPKM values of all 239 miRNAs detected in IECs

| miRNAs     | ENSEMBL No.          | Sham-IEC | Sepsis1-IEC | Sepsis2-IEC | Sepsis3-IEC |
|------------|----------------------|----------|-------------|-------------|-------------|
| Mir100     | ENSMUSG00000093011.1 | 10.608   | 12.863      | 18.25       | 10.569      |
| Mir101b    | ENSMUSG00000065556.1 | 1778.923 | 1491.096    | 1797.01     | 1215.885    |
| Mir103-1   | ENSMUSG00000065553.1 | 8.486    | 11.873      | 12.384      | 13.652      |
| Mir103-2   | ENSMUST00000083629.1 | 51.978   | 65.303      | 61.269      | 49.322      |
| Mir106a    | ENSMUSG00000065456.1 | 8.486    | 8.905       | 13.688      | 7.046       |
| Mir106b    | ENSMUSG00000065514.1 | 7786.105 | 7362.472    | 7592.808    | 5742.095    |
| Mir107     | ENSMUSG00000065594.1 | 308.686  | 266.161     | 365.659     | 321.476     |
| Mir10a     | ENSMUSG00000065519.1 | 1457.508 | 2135.226    | 1480.236    | 1112.836    |
| Mir10b     | ENSMUST00000083566.2 | 221.702  | 331.465     | 245.076     | 178.794     |
| Mir1198    | ENSMUST00000116995.1 | 11.669   | 5.937       | 1.955       | 1.762       |
| Mir122     | ENSMUST00000083468.1 | 4.243    | 19.789      | 8.473       | 6.606       |
| Mir1224    | ENSMUSG00000080669.1 | 2.122    | 1.979       | 1.304       | 5.725       |
| Mir124-2hg | ENSMUST00000188983.2 | 4.243    | 1.979       | 0.652       | 0.881       |
| Mir1247    | ENSMUSG00000080356.1 | 1.061    | 0.989       | 0.652       | 0.44        |
| Mir1258    | ENSMUSG00000099196.1 | 19.094   | 3.958       | 4.563       | 3.523       |
| Mir127     | ENSMUSG00000070076.1 | 4.243    | 30.673      | 11.732      | 9.248       |
| Mir128-1   | ENSMUST00000083586.1 | 28.641   | 21.768      | 42.367      | 19.817      |
| Mir130a    | ENSMUST00000083550.1 | 111.382  | 235.488     | 174.682     | 173.069     |
| Mir130b    | ENSMUSG00000065572.1 | 183.514  | 186.016     | 192.933     | 118.021     |
| Mir132     | ENSMUST00000083603.1 | 8.486    | 13.852      | 18.25       | 15.413      |
| Mir135b    | ENSMUST00000083501.1 | 1.061    | 3.958       | 2.607       | 0.881       |
| Mir136     | ENSMUSG00000070129.1 | 10.608   | 39.578      | 34.545      | 17.175      |
| Mir138-1   | ENSMUST00000083480.1 | 4.243    | 7.916       | 7.17        | 6.165       |
| Mir138-2   | ENSMUSG00000065512.2 | 2.122    | 3.958       | 0.652       | 3.523       |
| Mir139     | ENSMUST00000083512.1 | 150.63   | 162.269     | 241.166     | 145.325     |
| Mir140     | ENSMUSG00000065439.1 | 549.483  | 437.335     | 634.852     | 431.571     |
| Mir141     | ENSMUST00000083540.1 | 281.106  | 278.034     | 286.14      | 204.776     |
| Mir143     | ENSMUST00000083511.2 | 2402.66  | 5340.043    | 3813.677    | 3912.763    |
| Mir144     | ENSMUSG00000065401.1 | 5.304    | 0.989       | 9.125       | 1.762       |
| Mir145a    | ENSMUST00000083658.1 | 3303.26  | 6373.025    | 5908.559    | 6315.468    |
| Mir146     | ENSMUSG00000070127.2 | 771.185  | 1529.684    | 1192.792    | 939.768     |
| Mir148a    | ENSMUSG00000065505.1 | 1258.082 | 1401.056    | 1499.79     | 1204.876    |
| Mir148b    | ENSMUSG00000065560.1 | 309.747  | 402.705     | 353.275     | 240.006     |
| Mir149     | ENSMUSG00000065470.1 | 1.061    | 3.958       | 2.607       | 3.523       |
| Mir150     | ENSMUSG00000065495.1 | 110.321  | 52.441      | 147.958     | 120.664     |
| Mir151     | ENSMUSG00000065612.1 | 1142.457 | 1129.948    | 1370.734    | 1009.347    |
| Mir152     | ENSMUST00000083581.1 | 83.801   | 159.301     | 163.602     | 112.297     |
| Mir153     | ENSMUSG00000065538.1 | 19.094   | 34.631      | 29.331      | 16.294      |
| Mir154     | ENSMUST00000083514.1 | 2.122    | 10.884      | 14.34       | 4.844       |
| Mir15a     | ENSMUST00000175266.1 | 4304.634 | 3287.931    | 4355.322    | 2854.093    |



|           |                      |           |           |           |           |
|-----------|----------------------|-----------|-----------|-----------|-----------|
| Mir15b    | ENSMUSG00000065580.1 | 1556.16   | 400.726   | 608.129   | 1047.66   |
| Mir16-1   | ENSMUST00000175254.1 | 118.807   | 116.755   | 173.379   | 83.672    |
| Mir16-2   | ENSMUSG00000065606.1 | 162.299   | 154.354   | 184.459   | 112.737   |
| Mir17hg   | ENSMUSG00000089726.2 | 4.243     | 1.979     | 0.652     | 1.762     |
| Mir181a-1 | ENSMUST00000083631.1 | 7.425     | 5.937     | 11.732    | 3.083     |
| Mir181a-2 | ENSMUST00000083489.1 | 3.182     | 4.947     | 1.955     | 1.321     |
| Mir181b-2 | ENSMUST00000083644.1 | 16.972    | 25.726    | 19.554    | 17.175    |
| Mir181c   | ENSMUSG00000065483.1 | 305.504   | 423.483   | 389.776   | 370.799   |
| Mir181d   | ENSMUST00000102383.1 | 21.216    | 43.536    | 34.545    | 36.992    |
| Mir182    | ENSMUSG00000076361.1 | 557.969   | 645.119   | 664.183   | 428.929   |
| Mir183    | ENSMUSG00000065619.2 | 782.854   | 683.708   | 795.847   | 510.399   |
| Mir185    | ENSMUSG00000065464.1 | 589.792   | 501.649   | 634.852   | 488.38    |
| Mir186    | ENSMUST00000083497.1 | 151.691   | 238.457   | 144.699   | 95.122    |
| Mir187    | ENSMUSG00000065532.1 | 31.823    | 37.599    | 44.974    | 28.625    |
| Mir188    | ENSMUSG00000065398.1 | 24.398    | 30.673    | 35.849    | 24.661    |
| Mir18b    | ENSMUST00000103923.2 | 42.431    | 53.43     | 42.367    | 43.597    |
| Mir190a   | ENSMUST00000102424.1 | 212.155   | 206.794   | 211.835   | 83.232    |
| Mir190b   | ENSMUSG00000077996.1 | 1.061     | 2.968     | 2.607     | 0.881     |
| Mir192    | ENSMUSG00000065523.1 | 22629.561 | 17348.956 | 20154.281 | 13372.533 |
| Mir1927   | ENSMUSG00000089204.1 | 3.182     | 2.968     | 3.259     | 2.642     |
| Mir1934   | ENSMUST00000158127.1 | 1.061     | 3.958     | 1.955     | 2.642     |
| Mir1938   | ENSMUSG00000089371.1 | 2.122     | 0.989     | 0.652     | 1.321     |
| Mir193a   | ENSMUST00000083461.1 | 49.857    | 105.871   | 56.707    | 60.332    |
| Mir193b   | ENSMUST00000103784.2 | 3.182     | 6.926     | 4.563     | 9.248     |
| Mir194-1  | ENSMUST00000083647.1 | 5424.815  | 2457.785  | 4372.269  | 3444.2    |
| Mir194-2  | ENSMUSG00000065582.1 | 6173.723  | 4725.597  | 5503.14   | 4886.88   |
| Mir195a   | ENSMUSG00000065411.2 | 51.978    | 85.092    | 74.305    | 73.984    |
| Mir1964   | ENSMUST00000158514.1 | 3.182     | 5.937     | 4.563     | 4.404     |
| Mir1968   | ENSMUST00000157429.1 | 8.486     | 9.894     | 11.732    | 11.89     |
| Mir196a-1 | ENSMUSG00000065546.1 | 2.122     | 1.979     | 3.911     | 2.642     |
| Mir196a-2 | ENSMUSG00000065488.1 | 21.216    | 20.778    | 9.777     | 9.688     |
| Mir1981   | ENSMUSG00000088559.1 | 31.823    | 17.81     | 30.635    | 36.551    |
| Mir1983   | ENSMUST00000157523.1 | 319.294   | 150.396   | 153.173   | 121.104   |
| Mir199b   | ENSMUSG00000092807.1 | 8.486     | 26.715    | 18.25     | 9.688     |
| Mir19b-2  | ENSMUST00000083539.1 | 117.746   | 140.501   | 166.209   | 110.095   |
| Mir200a   | ENSMUST00000083466.1 | 44587.649 | 45418.566 | 47080.103 | 32250.678 |
| Mir200b   | ENSMUST00000083615.2 | 23220.414 | 21002.982 | 21854.825 | 14951.73  |
| Mir200c   | ENSMUSG00000065462.2 | 11919.954 | 15122.701 | 12494.337 | 9800.183  |
| Mir203    | ENSMUSG00000065574.1 | 4804.26   | 4863.13   | 5416.451  | 3354.363  |
| Mir20b    | ENSMUST00000102087.1 | 141.083   | 143.47    | 118.627   | 133.435   |
| Mir210    | ENSMUSG00000065551.1 | 55.16     | 79.156    | 51.492    | 40.515    |
| Mir212    | ENSMUST00000083656.1 | 2.122     | 7.916     | 10.429    | 2.642     |
| Mir2137   | ENSMUSG00000089357.1 | 1.061     | 0.989     | 0.652     | 1.321     |

|           |                      |          |          |          |          |
|-----------|----------------------|----------|----------|----------|----------|
| Mir21c    | ENSMUSG00000099326.1 | 25.459   | 26.715   | 29.331   | 10.569   |
| Mir221    | ENSMUSG00000065422.1 | 212.155  | 278.034  | 321.337  | 206.538  |
| Mir222    | ENSMUST00000083537.1 | 155.934  | 161.28   | 194.236  | 132.554  |
| Mir224    | ENSMUSG00000065542.1 | 113.503  | 93.997   | 114.717  | 59.011   |
| Mir22hg   | ENSMUSG00000085148.1 | 8.486    | 4.947    | 9.777    | 7.046    |
| Mir23a    | ENSMUSG00000065611.1 | 729.815  | 763.853  | 1173.89  | 610.365  |
| Mir23b    | ENSMUSG00000065599.1 | 3581.184 | 3099.936 | 4194.979 | 2365.713 |
| Mir24-2   | ENSMUST00000083607.1 | 21.216   | 22.757   | 24.117   | 16.734   |
| Mir26a-1  | ENSMUST00000083579.1 | 31.823   | 24.736   | 35.849   | 14.973   |
| Mir26a-2  | ENSMUSG00000065430.1 | 9.547    | 9.894    | 20.858   | 9.688    |
| Mir26b    | ENSMUST00000083534.1 | 2175.654 | 1449.539 | 1903.905 | 1096.102 |
| Mir27a    | ENSMUST00000083510.1 | 447.648  | 620.383  | 731.97   | 364.193  |
| Mir27b    | ENSMUST00000083541.1 | 3091.105 | 3446.242 | 3619.441 | 1925.335 |
| Mir28a    | ENSMUSG00000065494.1 | 393.548  | 323.549  | 348.713  | 305.182  |
| Mir296    | ENSMUST00000083587.1 | 21.216   | 40.567   | 10.429   | 35.23    |
| Mir298    | ENSMUSG00000065410.1 | 28.641   | 43.536   | 11.732   | 33.469   |
| Mir29a    | ENSMUST00000083676.1 | 9611.702 | 11299.48 | 11057.12 | 7502.728 |
| Mir29b-1  | ENSMUST00000083670.1 | 18.033   | 16.821   | 27.376   | 17.175   |
| Mir300    | ENSMUST00000083485.2 | 4.243    | 12.863   | 10.429   | 5.285    |
| Mir301    | ENSMUSG00000065589.1 | 434.919  | 276.056  | 331.114  | 254.539  |
| Mir301b   | ENSMUSG00000076288.1 | 39.249   | 52.441   | 46.278   | 25.542   |
| Mir3057   | ENSMUSG00000092781.1 | 1.061    | 3.958    | 0.652    | 0.44     |
| Mir3060   | ENSMUSG00000093080.1 | 1.061    | 0.989    | 1.304    | 3.083    |
| Mir3074-1 | ENSMUSG00000092741.1 | 1.061    | 0.989    | 0.652    | 1.762    |
| Mir3076   | ENSMUSG00000093156.1 | 1.061    | 0.989    | 0.652    | 0.881    |
| Mir3091   | ENSMUST00000175086.1 | 2.122    | 1.979    | 7.17     | 2.642    |
| Mir3095   | ENSMUSG00000093293.1 | 1.061    | 1.979    | 1.955    | 3.963    |
| Mir3096   | ENSMUST00000116685.1 | 4.243    | 34.631   | 12.384   | 27.303   |
| Mir30a    | ENSMUSG00000065405.2 | 2055.786 | 2307.389 | 2762.977 | 1835.938 |
| Mir30b    | ENSMUST00000083542.2 | 7201.617 | 7394.134 | 8320.868 | 5099.142 |
| Mir30c-1  | ENSMUSG00000065490.1 | 40.31    | 20.778   | 24.117   | 19.377   |
| Mir30e    | ENSMUSG00000065409.1 | 3232.188 | 3093.01  | 3588.154 | 2350.74  |
| Mir31     | ENSMUSG00000065408.1 | 6531.205 | 5004.621 | 6892.124 | 4821.264 |
| Mir3105   | ENSMUSG00000093221.1 | 56.221   | 48.483   | 66.484   | 60.332   |
| Mir3109   | ENSMUSG00000093042.1 | 1.061    | 1.979    | 0.652    | 0.881    |
| Mir3110   | ENSMUST00000175053.1 | 2.122    | 0.989    | 1.304    | 0.44     |
| Mir32     | ENSMUSG00000065544.1 | 849.683  | 563.985  | 545.556  | 339.532  |
| Mir320    | ENSMUSG00000065528.1 | 295.957  | 446.24   | 394.338  | 359.789  |
| Mir322    | ENSMUSG00000065418.1 | 16.972   | 13.852   | 27.376   | 19.817   |
| Mir326    | ENSMUST00000083637.1 | 61.525   | 93.008   | 66.484   | 48.442   |
| Mir328    | ENSMUST00000093622.1 | 3.182    | 17.81    | 11.081   | 8.367    |
| Mir329    | ENSMUST00000083643.1 | 3.182    | 6.926    | 14.991   | 2.642    |
| Mir33     | ENSMUST00000083531.1 | 877.263  | 1077.507 | 795.195  | 550.913  |

|            |                      |          |          |          |          |
|------------|----------------------|----------|----------|----------|----------|
| Mir337     | ENSMUSG00000065526.3 | 5.304    | 8.905    | 9.777    | 5.285    |
| Mir338     | ENSMUSG00000065600.1 | 5.304    | 5.937    | 9.777    | 2.642    |
| Mir339     | ENSMUST00000083659.1 | 152.752  | 159.301  | 204.013  | 127.269  |
| Mir340     | ENSMUSG00000065417.1 | 212.155  | 283.971  | 314.167  | 151.05   |
| Mir342     | ENSMUSG00000065436.1 | 152.752  | 180.079  | 193.584  | 141.802  |
| Mir345     | ENSMUST00000083495.1 | 808.312  | 794.526  | 860.375  | 571.171  |
| Mir3473d   | ENSMUST00000175346.1 | 7.425    | 1.979    | 6.518    | 3.523    |
| Mir34a     | ENSMUST00000083559.1 | 526.146  | 669.855  | 782.811  | 754.368  |
| Mir34b     | ENSMUST00000083558.1 | 7.425    | 8.905    | 11.732   | 3.523    |
| Mir34c     | ENSMUSG00000065587.1 | 1.061    | 6.926    | 8.473    | 1.762    |
| Mir350     | ENSMUSG00000065573.1 | 32.884   | 25.726   | 54.099   | 16.734   |
| Mir351     | ENSMUSG00000065503.1 | 2.122    | 0.989    | 0.652    | 0.881    |
| Mir3547    | ENSMUSG00000093202.2 | 3.182    | 1.979    | 1.304    | 2.202    |
| Mir361     | ENSMUSG00000065510.1 | 275.802  | 192.942  | 266.586  | 215.345  |
| Mir362     | ENSMUSG00000099172.1 | 219.581  | 248.351  | 244.425  | 144.004  |
| Mir363     | ENSMUSG00000070106.1 | 81.68    | 68.272   | 70.394   | 74.424   |
| Mir369     | ENSMUST00000083627.2 | 6.365    | 7.916    | 3.259    | 3.083    |
| Mir374b    | ENSMUST00000102314.1 | 844.379  | 738.127  | 840.821  | 601.117  |
| Mir375     | ENSMUST00000083682.2 | 2577.689 | 3507.588 | 3760.229 | 2300.978 |
| Mir376b    | ENSMUSG00000076006.1 | 4.243    | 10.884   | 6.518    | 6.165    |
| Mir378c    | ENSMUST00000184478.1 | 1.061    | 3.958    | 3.259    | 3.523    |
| Mir379     | ENSMUSG00000065498.3 | 8.486    | 25.726   | 24.117   | 14.973   |
| Mir382     | ENSMUSG00000065428.3 | 2.122    | 7.916    | 3.259    | 3.963    |
| Mir411     | ENSMUSG00000065477.2 | 6.365    | 18.799   | 22.813   | 4.404    |
| Mir421     | ENSMUST00000083575.2 | 31.823   | 24.736   | 29.331   | 21.579   |
| Mir423     | ENSMUSG00000065518.2 | 553.726  | 812.336  | 804.972  | 659.687  |
| Mir431     | ENSMUSG00000070080.1 | 1.061    | 2.968    | 1.955    | 2.202    |
| Mir434     | ENSMUSG00000070133.1 | 5.304    | 32.652   | 28.679   | 16.734   |
| Mir449a    | ENSMUST00000083641.1 | 5.304    | 11.873   | 13.036   | 7.927    |
| Mir449c    | ENSMUSG00000076146.1 | 3.182    | 2.968    | 1.304    | 1.762    |
| Mir451a    | ENSMUSG00000070065.1 | 13.79    | 45.515   | 48.233   | 21.579   |
| Mir452     | ENSMUSG00000070138.1 | 2.122    | 1.979    | 2.607    | 1.321    |
| Mir455     | ENSMUST00000093594.1 | 13.79    | 19.789   | 7.17     | 14.532   |
| Mir466b-2  | ENSMUSG00000076966.2 | 2.122    | 0.989    | 1.304    | 1.762    |
| Mir466q    | ENSMUST00000175249.1 | 1.061    | 5.937    | 7.17     | 4.844    |
| Mir467a-1  | ENSMUSG00000096624.1 | 2.122    | 2.968    | 3.259    | 3.083    |
| Mir467a-10 | ENSMUST00000179320.1 | 3.182    | 8.905    | 1.955    | 2.642    |
| Mir467a-2  | ENSMUST00000179447.1 | 1.061    | 0.989    | 1.955    | 2.202    |
| Mir467a-3  | ENSMUST00000178082.1 | 1.061    | 2.968    | 1.955    | 0.44     |
| Mir467a-7  | ENSMUSG00000094688.1 | 2.122    | 0.989    | 1.304    | 0.881    |
| Mir467c    | ENSMUSG00000077049.2 | 3.182    | 1.979    | 8.473    | 3.523    |
| Mir467d    | ENSMUST00000103833.2 | 1.061    | 3.958    | 1.955    | 0.881    |
| Mir467e    | ENSMUST00000103760.2 | 2.122    | 15.831   | 11.081   | 5.285    |

|           |                      |          |          |         |         |
|-----------|----------------------|----------|----------|---------|---------|
| Mir484    | ENSMUST00000093566.1 | 819.981  | 1078.497 | 978.35  | 845.086 |
| Mir490    | ENSMUSG00000070075.1 | 2.122    | 0.989    | 2.607   | 2.642   |
| Mir491    | ENSMUST00000093569.2 | 2.122    | 3.958    | 1.955   | 0.44    |
| Mir494    | ENSMUSG00000070141.2 | 5.304    | 3.958    | 3.259   | 0.881   |
| Mir495    | ENSMUSG00000070105.2 | 1.061    | 9.894    | 3.911   | 3.083   |
| Mir500    | ENSMUSG00000070108.2 | 85.923   | 83.114   | 99.073  | 60.332  |
| Mir501    | ENSMUST00000102296.1 | 19.094   | 34.631   | 20.206  | 14.973  |
| Mir503    | ENSMUST00000102168.1 | 21.216   | 12.863   | 20.858  | 19.377  |
| Mir505    | ENSMUST00000093573.2 | 23.337   | 20.778   | 28.027  | 13.652  |
| Mir5099   | ENSMUSG00000092998.1 | 82.741   | 82.124   | 90.6    | 59.891  |
| Mir5100   | ENSMUSG00000092734.1 | 10.608   | 11.873   | 26.724  | 7.927   |
| Mir511    | ENSMUST00000104704.1 | 1.061    | 11.873   | 2.607   | 2.642   |
| Mir5125   | ENSMUSG00000092981.1 | 4.243    | 1.979    | 1.304   | 1.321   |
| Mir5126   | ENSMUST00000175513.1 | 1.061    | 0.989    | 4.563   | 0.44    |
| Mir5136   | ENSMUST00000175573.1 | 1.061    | 2.968    | 1.304   | 0.881   |
| Mir532    | ENSMUSG00000070139.1 | 15.912   | 19.789   | 22.813  | 12.331  |
| Mir541    | ENSMUST00000102097.1 | 3.182    | 4.947    | 8.473   | 3.083   |
| Mir542    | ENSMUST00000102186.1 | 1.061    | 0.989    | 2.607   | 3.523   |
| Mir574    | ENSMUSG00000077042.2 | 32.884   | 42.546   | 60.617  | 28.625  |
| Mir582    | ENSMUST00000103758.2 | 329.902  | 280.013  | 329.159 | 173.509 |
| Mir598    | ENSMUST00000102094.3 | 11.669   | 4.947    | 1.955   | 6.606   |
| Mir615    | ENSMUST00000102056.1 | 1.061    | 1.979    | 1.304   | 0.881   |
| Mir6236   | ENSMUSG00000098973.1 | 616.312  | 798.483  | 374.784 | 917.308 |
| Mir6238   | ENSMUSG00000099176.1 | 173.967  | 29.683   | 37.153  | 40.515  |
| Mir6239   | ENSMUSG00000098648.1 | 377.637  | 315.633  | 104.94  | 274.796 |
| Mir6240   | ENSMUSG00000098343.1 | 1080.932 | 314.644  | 481.68  | 446.984 |
| Mir6406   | ENSMUSG00000099174.1 | 2.122    | 0.989    | 4.563   | 2.642   |
| Mir652    | ENSMUSG00000076011.1 | 456.134  | 399.736  | 437.357 | 395.46  |
| Mir6538   | ENSMUST00000183713.1 | 93.348   | 56.398   | 54.099  | 46.24   |
| Mir6539   | ENSMUST00000183732.1 | 3.182    | 1.979    | 7.822   | 5.285   |
| Mir669a-2 | ENSMUST00000102060.1 | 5.304    | 5.937    | 5.866   | 0.881   |
| Mir669a-4 | ENSMUST00000178277.1 | 2.122    | 11.873   | 11.732  | 4.404   |
| Mir669a-5 | ENSMUSG00000094547.1 | 1.061    | 3.958    | 3.911   | 3.083   |
| Mir669a-8 | ENSMUSG00000096602.1 | 2.122    | 3.958    | 4.563   | 3.083   |
| Mir669a-9 | ENSMUSG00000095225.1 | 2.122    | 1.979    | 0.652   | 1.762   |
| Mir669c   | ENSMUSG00000076118.1 | 1.061    | 6.926    | 3.911   | 1.762   |
| Mir669o   | ENSMUSG00000077086.1 | 1.061    | 8.905    | 5.866   | 4.844   |
| Mir672    | ENSMUST00000102331.1 | 5.304    | 14.842   | 1.304   | 4.404   |
| Mir674    | ENSMUST00000102421.1 | 160.177  | 158.311  | 185.111 | 121.985 |
| Mir677    | ENSMUSG00000093245.1 | 162.299  | 155.343  | 76.912  | 167.784 |
| Mir6946   | ENSMUST00000183515.1 | 1.061    | 1.979    | 1.304   | 1.321   |
| Mir6969   | ENSMUST00000183777.1 | 3.182    | 4.947    | 6.518   | 3.523   |
| Mir7-1    | ENSMUSG00000065434.1 | 242.918  | 273.087  | 293.31  | 176.592 |

|            |                      |          |          |           |          |
|------------|----------------------|----------|----------|-----------|----------|
| Mir7-2     | ENSMUSG00000065609.1 | 27.58    | 28.694   | 38.456    | 19.817   |
| Mir700     | ENSMUST00000102169.1 | 29.702   | 39.578   | 24.117    | 19.377   |
| Mir7003    | ENSMUSG00000099091.1 | 7.425    | 4.947    | 5.214     | 7.046    |
| Mir7043    | ENSMUST00000184219.1 | 3.182    | 6.926    | 4.563     | 3.523    |
| Mir708     | ENSMUST00000102189.1 | 2.122    | 4.947    | 2.607     | 2.202    |
| Mir717     | ENSMUSG00000076214.1 | 5.304    | 1.979    | 2.607     | 2.202    |
| Mir744     | ENSMUST00000103261.1 | 230.189  | 290.897  | 232.04    | 154.573  |
| Mir7662    | ENSMUST00000184761.1 | 2.122    | 3.958    | 3.259     | 1.762    |
| Mir7669    | ENSMUST00000183442.1 | 5.304    | 4.947    | 1.955     | 1.321    |
| Mir7b      | ENSMUST00000083557.1 | 89.105   | 81.135   | 102.332   | 73.103   |
| Mir802     | ENSMUSG00000076457.1 | 3731.814 | 2267.812 | 3191.209  | 1680.044 |
| Mir8103    | ENSMUST00000183945.1 | 3.182    | 6.926    | 3.911     | 1.321    |
| Mir872     | ENSMUST00000104728.1 | 79.558   | 98.945   | 88.645    | 79.709   |
| Mir877     | ENSMUST00000104738.1 | 46.674   | 61.346   | 65.18     | 35.23    |
| Mir92-2    | ENSMUST00000083679.1 | 42.431   | 77.177   | 48.233    | 36.111   |
| Mir96      | ENSMUSG00000065586.1 | 218.52   | 225.594  | 224.871   | 169.986  |
| Mir98      | ENSMUST00000083602.2 | 832.71   | 739.117  | 829.74    | 520.527  |
| Mir99a     | ENSMUSG00000065530.1 | 41.37    | 81.135   | 52.144    | 55.488   |
| Mir99b     | ENSMUST00000083462.1 | 9.547    | 22.757   | 13.688    | 11.009   |
| Mirlet7a-1 | ENSMUSG00000065421.2 | 23.337   | 27.705   | 35.197    | 22.459   |
| Mirlet7a-2 | ENSMUSG00000092770.1 | 21.216   | 8.905    | 19.554    | 20.257   |
| Mirlet7b   | ENSMUST00000083630.1 | 3258.708 | 4874.014 | 5181.803  | 3682.004 |
| Mirlet7c-1 | ENSMUSG00000065557.2 | 29.702   | 31.662   | 31.286    | 30.826   |
| Mirlet7c-2 | ENSMUST00000083674.1 | 39.249   | 55.409   | 59.314    | 52.405   |
| Mirlet7f-2 | ENSMUST00000083668.1 | 301.261  | 298.813  | 427.58    | 261.585  |
| Mirlet7g   | ENSMUSG00000065440.1 | 9988.278 | 9117.75  | 11845.146 | 7639.686 |
| Mirlet7i   | ENSMUST00000083472.2 | 3361.603 | 3387.865 | 3816.284  | 2434.412 |

**Table S2.** Primer sequences for RT-qPCR used in this study

|                 | Forward (5' → 3')          | Reverse (5' → 3')         |
|-----------------|----------------------------|---------------------------|
| mmu-miR-127-3p  | TCGGATCCGTCTGAGCTTGGCT     | Universal primer          |
| mmu-miR-149-5p  | TCTGGCTCCGTGTCTTCACTCCC    | Universal primer          |
| mmu-miR-154-3p  | AATCATACACGGTTGACCTATT     | Universal primer          |
| mmu-miR-154-5p  | TAGGTTATCCGTGTTGCCTTCG     | Universal primer          |
| mmu-miR-328-3p  | CTGGCCCTCTCTGCCCTTCCGT     | Universal primer          |
| mmu-miR-351-5p  | TCCCTGAGGAGCCCTTTGAGCCTG   | Universal primer          |
| mmu-miR-378c    | ACTGGACTTGGAGTCAGAAGC      | Universal primer          |
| mmu-miR-434-3p  | TTTGAACCATCACTCGACTCCT     | Universal primer          |
| mmu-miR-434-5p  | GCTCGACTCATGGTTTGAACCA     | Universal primer          |
| mmu-miR-466q    | GTGCACACACACACATACGT       | Universal primer          |
| mmu-miR-467e-5p | ATAAGTGTGAGCATGTATATGT     | Universal primer          |
| mmu-miR-495-3p  | GAAGTTGCCCATGTTATTTTTC     | Universal primer          |
| mmu-miR-495-5p  | GAAGTTGCCCATGTTATTTTTCG    | Universal primer          |
| mmu-miR-511-3p  | AATGTGTAGCAAAAGACAGGAT     | Universal primer          |
| mmu-miR-511-5p  | ATGCCTTTTGCTCTGCACTCA      | Universal primer          |
| mmu-miR-669o-3p | ACATAACATACACACACAGTAT     | Universal primer          |
| mmu-miR-669o-5p | TAGTTGTGTGTGCATGTTTATGT    | Universal primer          |
| mmu-miR-717     | TAGTTGTGTGTGCATGTTTATGT    | Universal primer          |
| mmu-miR-1258-3p | TTAGGGAATTAGCTCAGCAGTA     | Universal primer          |
| mmu-miR-1983    | CTCACCTGGAGCATGTTTTCT      | Universal primer          |
| mmu-miR-3096-5p | TTGGCCAAGGATGAGAAC         | Universal primer          |
| mmu-miR-5125    | TCTGCCTGGGATTTCTTGT        | Universal primer          |
| hsa-miR-149-5p  | TCTGGCTCCGTGTCTTCACTCCC    | Universal primer          |
| hsa-miR-466q    | GTGCACACACACACATACGT       | Universal primer          |
| has-miR-495-3p  | GAAGTTGCCCATGTTATTTTTC     | Universal primer          |
| has-miR-495-5p  | GAAGTTGCCCATGTTATTTTTCG    | Universal primer          |
| hsa-miR-511-3p  | AATGTGTAGCAAAAGACAGA       | Universal primer          |
| U6              | GCGCGTCGTGAAGCGTTC         | GTGCAGGGTCCGAGGT          |
| mouse DNMT1     | CCTAGTTCCGTGGCTACGAGGAGAA  | TCTCTCTCCTCTGCAGCCGACTCA  |
| mouse DNMT3A    | GCCGAATTGTGTCTTGGTGGATGACA | CCTGGTGGAATGCACTGCAGAAGGA |
| mouse LOX       | AAGCAGAGCCTTCCTGCAAA       | GGTCACAGCGGTCTCGTTGT      |
| mouse PTCH1     | CGGACCGGGACTATCTGCAC       | CCTTCCCCTTGGAATCTGCT      |
| mouse COL22A1   | GGGGAACCTGGATACGCTAAA      | CAAAGTACGCACACTGGGAG      |

|                      |                           |                           |
|----------------------|---------------------------|---------------------------|
| mouse FOXO1          | ACATTTTCGTCCTCGAACCAGCTCA | ATTTTCAGACAGACTGGGCAGCGTA |
| mouse HMGA2          | TGAGTTTGGAGAACGCACCA      | TGAGAGTGGAAGCGATGAGC      |
| mouse $\beta$ -actin | CATCGTACTCCTGCTTGCTG      | AGCGCAAGTACTCTGTGTGG      |
| human LOX            | GCAGATGTCAGAGATTATGATCA   | ATCGCCTGTGGTAGCCATAGT     |
| human PTCH1          | GTTGCAGCGTTAAAGGAA        | CCAGCGGCTACTTACTCA        |
| human FOXO1          | AGACAACGACACATAGCTGG      | AGGGAGTTGGTGAAAGACATC     |
| human HMGA2          | GGCTCAGATTCAGGAACAGC      | GCTTCAACGGCAAAGTTCTC      |
| human $\beta$ -actin | GGATGCAGAAGGAGATCACTG     | CGATCCACACGGAGTACTTG      |

---

**Table S3.** Reactome pathways detected in IECs with sepsis, hit numbers, and *P* values

| Name                                                                                   | Hits | P value   | Adjusted P value |
|----------------------------------------------------------------------------------------|------|-----------|------------------|
| Innate immune system                                                                   | 42   | 0.00408   | 0.0075556        |
| Developmental biology                                                                  | 37   | 0.0000377 | 0.0009529        |
| Signalling by NGF                                                                      | 28   | 0.0000982 | 0.0009529        |
| Axon guidance                                                                          | 28   | 0.000162  | 0.0009529        |
| Cytokine signaling in immune system                                                    | 23   | 0.0159    | 0.0172826        |
| Fc epsilon receptor (FCERI) signaling                                                  | 20   | 0.0000789 | 0.0009529        |
| NGF signalling via TRKA from the plasma membrane                                       | 20   | 0.000365  | 0.001587         |
| Signaling by PDGF                                                                      | 19   | 0.000407  | 0.0016958        |
| Downstream signal transduction                                                         | 18   | 0.000138  | 0.0009529        |
| Signaling by FGFR1                                                                     | 18   | 0.000138  | 0.0009529        |
| Signaling by FGFR                                                                      | 18   | 0.000138  | 0.0009529        |
| Signaling by FGFR2                                                                     | 18   | 0.000138  | 0.0009529        |
| Signaling by FGFR3                                                                     | 18   | 0.000138  | 0.0009529        |
| Signaling by FGFR4                                                                     | 18   | 0.000138  | 0.0009529        |
| Signaling by ERBB2                                                                     | 18   | 0.000151  | 0.0009529        |
| DAP12 signaling                                                                        | 18   | 0.000235  | 0.0011381        |
| Signaling by EGFR                                                                      | 18   | 0.000569  | 0.0020944        |
| DAP12 interactions                                                                     | 18   | 0.000613  | 0.0020944        |
| Signaling by ERBB4                                                                     | 18   | 0.000712  | 0.0020944        |
| Downstream signaling of activated FGFR1                                                | 17   | 0.000144  | 0.0009529        |
| Downstream signaling of activated FGFR2                                                | 17   | 0.000144  | 0.0009529        |
| Downstream signaling of activated FGFR3                                                | 17   | 0.000144  | 0.0009529        |
| Downstream signaling of activated FGFR4                                                | 17   | 0.000144  | 0.0009529        |
| Downstream signaling events of B cell receptor (BCR)                                   | 17   | 0.00124   | 0.003            |
| Signaling by the B cell receptor (BCR)                                                 | 17   | 0.0066    | 0.0101539        |
| Generic transcription pathway                                                          | 17   | 0.00774   | 0.01075          |
| Gastrin-CREB signalling pathway via PKC and MAPK                                       | 17   | 0.00815   | 0.0110135        |
| Transmission across chemical synapses                                                  | 17   | 0.0095    | 0.0123205        |
| Signaling by SCF-KIT                                                                   | 15   | 0.000962  | 0.0025316        |
| Apoptosis                                                                              | 15   | 0.00812   | 0.0110135        |
| Programmed cell death                                                                  | 15   | 0.00961   | 0.0123205        |
| Signaling by interleukins                                                              | 14   | 0.000602  | 0.0020944        |
| Neurotransmitter receptor binding and downstream transmission in the postsynaptic cell | 14   | 0.00418   | 0.0076           |
| Membrane trafficking                                                                   | 14   | 0.0113    | 0.0134524        |
| IRS-related events triggered by IGF1R                                                  | 13   | 0.00016   | 0.0009529        |
| IGF1R signaling cascade                                                                | 13   | 0.00023   | 0.0011381        |
| Signaling by type 1 insulin-like growth factor 1 receptor (IGF1R)                      | 13   | 0.00023   | 0.0011381        |
| PI-3K cascade:FGFR1                                                                    | 12   | 0.000754  | 0.0020944        |
| PI-3K cascade:FGFR2                                                                    | 12   | 0.000754  | 0.0020944        |
| PI-3K cascade:FGFR3                                                                    | 12   | 0.000754  | 0.0020944        |
| PI-3K cascade:FGFR4                                                                    | 12   | 0.000754  | 0.0020944        |
| PIP3 activates AKT signaling                                                           | 12   | 0.000754  | 0.0020944        |



|                                                                                             |    |           |           |
|---------------------------------------------------------------------------------------------|----|-----------|-----------|
| PI3K events in ERBB4 signaling                                                              | 12 | 0.000754  | 0.0020944 |
| PI3K events in ERBB2 signaling                                                              | 12 | 0.000754  | 0.0020944 |
| GAB1 signalosome                                                                            | 12 | 0.00114   | 0.00285   |
| PI3K/AKT activation                                                                         | 12 | 0.00114   | 0.00285   |
| Role of LAT2/NTAL/LAB on calcium mobilization                                               | 12 | 0.00201   | 0.0043696 |
| Signaling by VEGF                                                                           | 12 | 0.00284   | 0.0059167 |
| IRS-mediated signalling                                                                     | 11 | 0.00141   | 0.0032791 |
| IRS-related events                                                                          | 11 | 0.0019    | 0.0043182 |
| Insulin receptor signalling cascade                                                         | 11 | 0.00305   | 0.0062245 |
| VEGFA-VEGFR2 pathway                                                                        | 11 | 0.00432   | 0.0077143 |
| Signaling by insulin receptor                                                               | 11 | 0.0181    | 0.0182828 |
| Translocation of Glut4 to the plasma membrane                                               | 10 | 0.000239  | 0.0011381 |
| Translocation of GLUT4 to the plasma membrane                                               | 10 | 0.000279  | 0.0012682 |
| Transport of inorganic cations/anions and amino acids/oligopeptides                         | 10 | 0.0174    | 0.0179592 |
| TP53 regulates metabolic genes                                                              | 8  | 0.00605   | 0.0094531 |
| Transcriptional regulation by TP53                                                          | 8  | 0.00605   | 0.0094531 |
| GABA receptor activation                                                                    | 8  | 0.00744   | 0.0104789 |
| PI3K cascade                                                                                | 8  | 0.0168    | 0.0178723 |
| Caspase activation via extrinsic apoptotic signalig pathway                                 | 7  | 0.0000935 | 0.0009529 |
| Nucleotide-binding domain, leucine rich repeat containing receptor (NLR) signaling pathways | 7  | 0.00397   | 0.0074906 |
| Interleukin-1 signaling                                                                     | 7  | 0.00515   | 0.0085833 |
| Amino acid and oligopeptide SLC transporters                                                | 7  | 0.0103    | 0.0124096 |
| G alpha (12/13) signalling events                                                           | 7  | 0.0184    | 0.0184    |
| Activation of GABAB receptors                                                               | 6  | 0.0176    | 0.0179592 |
| GABA B receptor activation                                                                  | 6  | 0.0176    | 0.0179592 |
| CD28 dependent PI3K/Akt signaling                                                           | 5  | 0.000496  | 0.001984  |
| Frs2-mediated activation                                                                    | 5  | 0.00126   | 0.003     |
| Prolonged ERK activation events                                                             | 5  | 0.0021    | 0.0044681 |
| NOD1/2 signaling pathway                                                                    | 5  | 0.00704   | 0.0104789 |
| CD28 co-stimulation                                                                         | 5  | 0.00704   | 0.0104789 |
| Synthesis of IP3 and IP4 in the cytosol                                                     | 5  | 0.00831   | 0.01108   |
| FRS-mediated FGFR1 signaling                                                                | 5  | 0.013     | 0.0152941 |
| Formation of transcription-coupled NER (TC-NER) repair complex                              | 5  | 0.015     | 0.0164835 |
| Dual incision reaction in TC-NER                                                            | 5  | 0.015     | 0.0164835 |
| Ca2+ pathway                                                                                | 5  | 0.017     | 0.0178947 |
| Pre-NOTCH expression and processing                                                         | 4  | 0.000867  | 0.0023432 |
| Signalling to p38 via RIT and RIN                                                           | 4  | 0.00465   | 0.0081579 |
| Ligand-dependent caspase activation                                                         | 4  | 0.00597   | 0.0094531 |
| ARMS-mediated activation                                                                    | 4  | 0.00597   | 0.0094531 |
| SHC-related events triggered by IGF1R                                                       | 4  | 0.00931   | 0.01225   |
| JNK (c-Jun kinases) phosphorylation and activation mediated by activated human TAK1         | 4  | 0.0137    | 0.0153933 |
| Signaling by leptin                                                                         | 4  | 0.0163    | 0.0175269 |
| Beta-catenin phosphorylation cascade                                                        | 3  | 0.00196   | 0.0043556 |
| MEK activation                                                                              | 3  | 0.00331   | 0.0063654 |

|                                                                              |   |         |           |
|------------------------------------------------------------------------------|---|---------|-----------|
| RAF phosphorylates MEK                                                       | 3 | 0.00331 | 0.0063654 |
| Post-transcriptional silencing by small RNAs                                 | 3 | 0.00331 | 0.0063654 |
| Ligand-independent caspase activation via DCC                                | 3 | 0.00511 | 0.0085833 |
| Netrin mediated repulsion signals                                            | 3 | 0.00511 | 0.0085833 |
| Adrenoceptors                                                                | 3 | 0.0074  | 0.0104789 |
| Sodium/calcium exchangers                                                    | 3 | 0.0074  | 0.0104789 |
| HuR stabilizes mRNA                                                          | 3 | 0.0074  | 0.0104789 |
| RAF/MAP kinase cascade                                                       | 3 | 0.0102  | 0.0124096 |
| Processing and activation of SUMO                                            | 3 | 0.0102  | 0.0124096 |
| Regulation by c-FLIP                                                         | 3 | 0.0102  | 0.0124096 |
| CASP8 activity is inhibited                                                  | 3 | 0.0102  | 0.0124096 |
| NF-kB activation through FADD/RIP-1 pathway<br>mediated by caspase-8 and -10 | 3 | 0.0135  | 0.0153409 |
| AKT phosphorylates targets in the cytosol                                    | 3 | 0.0135  | 0.0153409 |
| Calnexin/calreticulin cycle                                                  | 3 | 0.0135  | 0.0153409 |

**Table S4.** GO pathways detected in IECs with sepsis, hit numbers, and *P* values

| Name                                                                 | Hits | P value   | Adjusted P value |
|----------------------------------------------------------------------|------|-----------|------------------|
| Regulation of signal transduction                                    | 139  | 0.00104   | 0.0049524        |
| Intracellular signal transduction                                    | 135  | 0.000617  | 0.0032474        |
| Nervous system development                                           | 133  | 0.00427   | 0.0090408        |
| Regulation of molecular function                                     | 132  | 0.0113    | 0.0137805        |
| Cell development                                                     | 117  | 0.00875   | 0.0123239        |
| Regulation of cellular component organization                        | 108  | 0.000044  | 0.0008856        |
| Negative regulation of cellular metabolic process                    | 107  | 0.00923   | 0.0126438        |
| Neurogenesis                                                         | 103  | 0.0000694 | 0.0008856        |
| Generation of neurons                                                | 97   | 0.0000887 | 0.000887         |
| Regulation of cellular protein metabolic process                     | 88   | 0.00763   | 0.0118235        |
| Neuron differentiation                                               | 81   | 0.002     | 0.0068           |
| Intracellular protein kinase cascade                                 | 73   | 0.00221   | 0.0068           |
| Neuron development                                                   | 70   | 0.0000549 | 0.0008856        |
| Regulation of protein modification process                           | 70   | 0.0097    | 0.0129114        |
| Positive regulation of signal transduction                           | 64   | 0.00764   | 0.0118235        |
| Cellular nitrogen compound catabolic process                         | 63   | 0.0167    | 0.017579         |
| Neuron projection development                                        | 60   | 0.000119  | 0.0010818        |
| Positive regulation of catalytic activity                            | 60   | 0.00234   | 0.0068           |
| Positive regulation of protein metabolic process                     | 60   | 0.00914   | 0.0126438        |
| Positive regulation of cellular component organization               | 58   | 6.22E-06  | 0.000622         |
| Transmission of nerve impulse                                        | 56   | 0.000925  | 0.004625         |
| Cell morphogenesis involved in differentiation                       | 54   | 0.000393  | 0.0023118        |
| Central nervous system development                                   | 53   | 0.00245   | 0.0068056        |
| Positive regulation of hydrolase activity                            | 53   | 0.0171    | 0.0178125        |
| Regulation of anatomical structure morphogenesis                     | 52   | 0.0136    | 0.0156322        |
| Positive regulation of cellular protein metabolic process            | 52   | 0.0156    | 0.0169565        |
| Regulation of neurogenesis                                           | 51   | 0.000078  | 0.0008856        |
| Behavior                                                             | 51   | 0.00192   | 0.0068           |
| Negative regulation of transcription from RNA polymerase II promoter | 51   | 0.0102    | 0.0129114        |
| Negative regulation of programmed cell death                         | 51   | 0.0142    | 0.0161364        |
| Regulation of catabolic process                                      | 50   | 0.0000644 | 0.0008856        |
| Negative regulation of apoptotic process                             | 50   | 0.0165    | 0.0175532        |
| Cell-cell signaling                                                  | 50   | 0.0165    | 0.0175532        |
| Positive regulation of phosphate metabolic process                   | 49   | 0.00599   | 0.0100333        |
| Positive regulation of protein modification process                  | 48   | 0.0101    | 0.0129114        |
| Brain development                                                    | 47   | 0.000054  | 0.0008856        |
| Synaptic transmission                                                | 45   | 0.00359   | 0.0081591        |
| MAPK cascade                                                         | 45   | 0.00736   | 0.0118235        |
| Positive regulation of phosphorylation                               | 43   | 0.00661   | 0.0108361        |
| Regulation of MAPK cascade                                           | 42   | 0.00297   | 0.0072439        |
| Positive regulation of protein phosphorylation                       | 41   | 0.0101    | 0.0129114        |
| Negative regulation of protein metabolic process                     | 40   | 0.00136   | 0.0061818        |

|                                                                  |    |           |           |
|------------------------------------------------------------------|----|-----------|-----------|
| Negative regulation of cellular protein metabolic process        | 38 | 0.000215  | 0.0016538 |
| Axonogenesis                                                     | 38 | 0.00026   | 0.0018571 |
| Small GTPase mediated signal transduction                        | 38 | 0.00238   | 0.0068    |
| I-kappaB kinase/NF-kappaB cascade                                | 36 | 0.0177    | 0.0179798 |
| Regulation of cell morphogenesis                                 | 33 | 0.000333  | 0.0020813 |
| Regulation of membrane potential                                 | 31 | 0.00275   | 0.0070513 |
| Regulation of small GTPase mediated signal transduction          | 30 | 0.00333   | 0.0077442 |
| Positive regulation of MAPK cascade                              | 30 | 0.00391   | 0.0086889 |
| Cell-cell adhesion                                               | 30 | 0.00572   | 0.0100333 |
| Regulation of Ras protein signal transduction                    | 28 | 0.002     | 0.0068    |
| Regulation of cell adhesion                                      | 27 | 0.00193   | 0.0068    |
| Transmembrane receptor protein tyrosine kinase signaling pathway | 27 | 0.0174    | 0.0179381 |
| Negative regulation of transport                                 | 26 | 0.0135    | 0.0156322 |
| Learning or memory                                               | 25 | 0.0000131 | 0.000655  |
| Ras protein signal transduction                                  | 25 | 0.000284  | 0.0018933 |
| Negative regulation of phosphate metabolic process               | 25 | 0.00804   | 0.0118235 |
| Regulation of neuron apoptotic process                           | 23 | 0.000206  | 0.0016538 |
| Regulation of MAP kinase activity                                | 23 | 0.00234   | 0.0068    |
| Cellular carbohydrate metabolic process                          | 23 | 0.00443   | 0.0090408 |
| Wound healing                                                    | 23 | 0.00822   | 0.011913  |
| Regulation of body fluid levels                                  | 23 | 0.0109    | 0.0134568 |
| Neuron apoptotic process                                         | 22 | 0.00166   | 0.0068    |
| Regulation of GTPase activity                                    | 22 | 0.0027    | 0.0070513 |
| Glycoprotein metabolic process                                   | 22 | 0.00844   | 0.0120571 |
| Apoptotic signaling pathway                                      | 21 | 0.00789   | 0.0118235 |
| Glycoprotein biosynthetic process                                | 20 | 0.00573   | 0.0100333 |
| Cell-substrate adhesion                                          | 20 | 0.00602   | 0.0100333 |
| Regulation of Ras GTPase activity                                | 19 | 0.00196   | 0.0068    |
| Locomotory behavior                                              | 19 | 0.00235   | 0.0068    |
| Regulation of action potential                                   | 19 | 0.00333   | 0.0077442 |
| Axon guidance                                                    | 19 | 0.00415   | 0.0090217 |
| Gliogenesis                                                      | 19 | 0.00601   | 0.0100333 |
| Positive regulation of MAP kinase activity                       | 18 | 0.00236   | 0.0068    |
| Response to toxin                                                | 18 | 0.0178    | 0.0179798 |
| Synapse organization                                             | 17 | 0.00235   | 0.0068    |
| Amino acid transport                                             | 17 | 0.00551   | 0.0100333 |
| Regulation of JNK cascade                                        | 16 | 0.00564   | 0.0100333 |
| Regulation of Rho protein signal transduction                    | 16 | 0.0109    | 0.0134568 |
| Blood coagulation                                                | 15 | 0.0102    | 0.0129114 |
| Coagulation                                                      | 15 | 0.0148    | 0.0162637 |
| Protein polyubiquitination                                       | 14 | 0.00436   | 0.0090408 |
| Regulation of axonogenesis                                       | 14 | 0.00534   | 0.0100333 |
| Response to hypoxia                                              | 14 | 0.0148    | 0.0162637 |
| Synapse assembly                                                 | 13 | 0.0000797 | 0.0008856 |
| Cell-matrix adhesion                                             | 13 | 0.0145    | 0.0162637 |
| G1/S transition of mitotic cell cycle                            | 12 | 0.00775   | 0.0118235 |

|                                              |    |          |           |
|----------------------------------------------|----|----------|-----------|
| Regulation of synapse structure and activity | 11 | 0.000599 | 0.0032474 |
| Glucan metabolic process                     | 11 | 0.0027   | 0.0070513 |
| Regulation of cell-cell adhesion             | 11 | 0.0046   | 0.0092    |
| Energy reserve metabolic process             | 11 | 0.00543  | 0.0100333 |
| Cellular polysaccharide metabolic process    | 11 | 0.00803  | 0.0118235 |
| Polysaccharide metabolic process             | 11 | 0.0132   | 0.0155294 |
| Peripheral nervous system development        | 9  | 0.00293  | 0.0072439 |
| Positive regulation of JUN kinase activity   | 8  | 0.0121   | 0.0145238 |
| Protein export from nucleus                  | 7  | 0.00569  | 0.0100333 |
| Post-golgi vesicle-mediated transport        | 6  | 0.0122   | 0.0145238 |
| Ectoderm development                         | 4  | 0.00987  | 0.0129114 |
| Calnexin/calreticulin cycle                  | 3  | 0.0135   | 0.0153409 |

**Table S5.** KEGG pathways detected in IECs with sepsis, hit numbers, and *P* values

| Name                                                     | Hits | P value   | Adjusted P value |
|----------------------------------------------------------|------|-----------|------------------|
| Pathways in cancer                                       | 33   | 0.000478  | 0.0053111        |
| Proteoglycans in cancer                                  | 21   | 0.000367  | 0.0046875        |
| MicroRNAs in cancer                                      | 21   | 0.0133    | 0.0271429        |
| Axon guidance                                            | 20   | 1.15E-06  | 0.000115         |
| Rap1 signaling pathway                                   | 20   | 0.00159   | 0.0083684        |
| MAPK signaling pathway                                   | 20   | 0.0105    | 0.0238636        |
| FoxO signaling pathway                                   | 18   | 0.0000304 | 0.00152          |
| Chemokine signaling pathway                              | 18   | 0.00344   | 0.0132308        |
| Oxytocin signaling pathway                               | 17   | 0.000756  | 0.0054071        |
| cGMP-PKG signaling pathway                               | 17   | 0.00194   | 0.0092381        |
| Dopaminergic synapse                                     | 16   | 0.000367  | 0.0046875        |
| Wnt signaling pathway                                    | 16   | 0.000757  | 0.0054071        |
| Calcium signaling pathway                                | 16   | 0.00735   | 0.0204167        |
| Neurotrophin signaling pathway                           | 15   | 0.000375  | 0.0046875        |
| Signaling pathways regulating pluripotency of stem cells | 15   | 0.00159   | 0.0083684        |
| Hippo signaling pathway                                  | 15   | 0.00403   | 0.0143929        |
| Melanogenesis                                            | 14   | 0.000133  | 0.0044333        |
| Chagas disease (American trypanosomiasis)                | 14   | 0.000204  | 0.0046875        |
| Insulin signaling pathway                                | 14   | 0.00454   | 0.0151667        |
| Phospholipase D signaling pathway                        | 14   | 0.00547   | 0.0165588        |
| Hepatitis B                                              | 14   | 0.00618   | 0.0176571        |
| Adrenergic signaling in cardiomyocytes                   | 14   | 0.00874   | 0.0217317        |
| Measles                                                  | 13   | 0.00891   | 0.0217317        |
| Prostate cancer                                          | 12   | 0.00062   | 0.0054071        |
| Retrograde endocannabinoid signaling                     | 12   | 0.00226   | 0.0098261        |
| Glutamatergic synapse                                    | 12   | 0.00563   | 0.0165588        |
| AMPK signaling pathway                                   | 12   | 0.0136    | 0.0272           |
| Serotonergic synapse                                     | 12   | 0.017     | 0.0320755        |
| ErbB signaling pathway                                   | 11   | 0.00177   | 0.00885          |
| Circadian entrainment                                    | 11   | 0.00455   | 0.0151667        |
| T cell receptor signaling pathway                        | 11   | 0.00765   | 0.0206757        |
| Insulin resistance                                       | 11   | 0.0114    | 0.0247826        |
| Sphingolipid signaling pathway                           | 11   | 0.0244    | 0.0441071        |
| Osteoclast differentiation                               | 11   | 0.027     | 0.0473684        |
| Colorectal cancer                                        | 10   | 0.000538  | 0.00538          |
| Long-term potentiation                                   | 10   | 0.000691  | 0.0054071        |
| Chronic myeloid leukemia                                 | 10   | 0.00154   | 0.0083684        |
| Estrogen signaling pathway                               | 10   | 0.0128    | 0.0266667        |
| Glucagon signaling pathway                               | 10   | 0.0166    | 0.0320755        |
| Acute myeloid leukemia                                   | 9    | 0.000938  | 0.0062533        |
| Long-term depression                                     | 9    | 0.00154   | 0.0083684        |
| RIG-I-like receptor signaling pathway                    | 9    | 0.00332   | 0.0132308        |
| Renal cell carcinoma                                     | 9    | 0.00332   | 0.0132308        |
| Adipocytokine signaling pathway                          | 9    | 0.0049    | 0.0158065        |

|                                               |   |          |           |
|-----------------------------------------------|---|----------|-----------|
| Apoptosis                                     | 9 | 0.0105   | 0.0238636 |
| Endometrial cancer                            | 8 | 0.00212  | 0.0096364 |
| Glioma                                        | 8 | 0.00857  | 0.0217317 |
| Central carbon metabolism in cancer           | 8 | 0.00938  | 0.0223333 |
| Gastric acid secretion                        | 8 | 0.0167   | 0.0320755 |
| Circadian rhythm                              | 7 | 0.000374 | 0.0046875 |
| Sphingolipid metabolism                       | 7 | 0.00541  | 0.0165588 |
| Basal cell carcinoma                          | 7 | 0.0114   | 0.0247826 |
| mTOR signaling pathway                        | 7 | 0.0195   | 0.0361111 |
| Cytosolic DNA-sensing pathway                 | 7 | 0.0247   | 0.0441071 |
| Thyroid cancer                                | 5 | 0.00891  | 0.0217317 |
| Other types of O-glycan biosynthesis          | 5 | 0.0118   | 0.0251064 |
| Glycosphingolipid biosynthesis - globo series | 4 | 0.00377  | 0.013963  |
